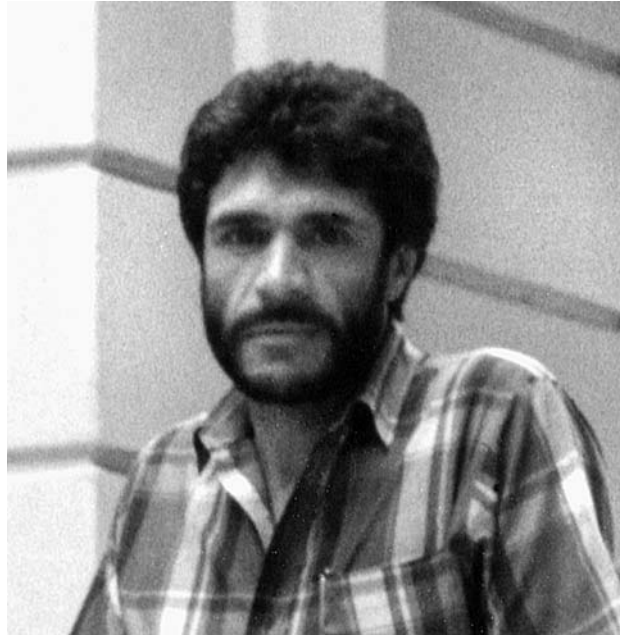

Brian Frederick Kensley  
17 April 1944–19 January 2004

Brian F. Kensley was a Research Zoologist in the Department of Invertebrate Zoology, National Museum of Natural History (NMNH), Smithsonian Institution, Washington, D.C., specializing in the systematics of decapod and isopod crustaceans. He passed away at his home in Washington, D.C., at the age of 59 after a long struggle with pulmonary hypertension and other chronic illnesses. The remains are interred within the walls of St. Margaret's Episcopal Church in Washington, D.C., alongside those of his longtime friend and partner, Kirk D. Miller.

In more than 35 years of active research, Brian produced more than 150 papers on marine and terrestrial isopods, decapods, amphipods, tanaidaceans, copepods, and Plio-Pleistocene mollusks (see publication list). He is one of the few scientists to have produced two major field guides in two different groups of crustaceans, "Guide to the Marine Isopod Crustaceans of the Caribbean" with co-author Marilyn Schotte (1989) and "Penaeoid and Sergestoid Shrimps and Prawns of the World—Keys and Diagnoses for the Families and Genera" with Dr. Isabel Pérez Farfante (1997). While still in South Africa, he authored "Sea Shells of Southern Africa—Gastropods" (1973) and the self-illustrated "Guide to the Marine Isopods of Southern Africa" in 1978.

Born in Cape Town, South Africa, to Victor Frederick and Mary Lydia Walters Kensley in 1944, Brian was the elder of two sons. His only brother Kit lives currently in Cape Town with his wife Gillian and two sons, Ryan and Simon. For most of junior high school, Brian attended a local Catholic convent in Cape Town and then Maitland

High School thereafter. He was perfectly bilingual, growing up speaking Afrikaans as well as English. As a youth, Brian discovered his talent as a classical pianist, a passion which accompanied him into his adult life, along with a fascination for opera and choral music. He could have become a pianist, an illustrator, or a singer, but fortunately for us he chose natural science. He was drawn early on to the unique biogeography of southern Africa, first studying botany in a place where about 75 percent of the plants were endemic. Brian matriculated (finished high school) at age 15 and received a Bachelor of Science in botany and zoology at 19 years of age. He spent 1964 obtaining an education diploma and taught at Goodwood-Epping High School in Cape Town until 1967. During long vacations in those years he spent many hours with well-known zoologist K. H. Barnard at the South African Museum and became interested in marine biology, mollusks, and intertidal ecology. At the time of his death, Barnard had left several unfinished manuscripts, which Brian was invited to complete, and thus he became familiar with the museum's collections. In 1969 he was given a research post at the museum as Chief Professional Officer, and in 1971 he received a M.Sc. degree from the University of Stellenbosch, followed by a Ph.D. in 1974 from the University of Cape Town for Science. During his years at South African Museum in Capetown, he trekked across the Namib desert, snorkeled off the coast of Mozambique, and crewed on many sea voyages in the rough waters around Cape Horn in pursuit of the study of natural history. Books about the sea were numerous in his library. At the time, Brian also developed skills as a talented

illustrator of plants and invertebrates, which he used in his own work throughout his career and in artistic hobbies.

Brian came to the National Museum of Natural History first in 1977 as a post-docoral fellow from South Africa, drawn to the strength of a then large and vital group of researchers in the Division of Crustacea. Emeritus curator Dr. Fenner A. Chace, Jr., took retirement the following year to allow Brian to become a member of the NMNH staff, and a few years later Brian became a naturalized citizen. He took to the seas again as a scuba diver, traveling many times to NMNH's station on Carrie Bow Cay, Belize to research the only barrier reef in the western hemisphere. During the 1980's, he was the Principal Investigator for several trips to the Seychelles and Aldabra besides spending months at a time on research fellowships in Brazil and Australia.

During these active years he traveled widely, having colleagues and friends the world over. Paul Clark of the British Museum of Natural History reminisces, "Brian would often turn up at the Natural History Museum, London, unannounced ... sometimes specimens were examined, but on other occasions he just potted around the laboratory; however, we always took Brian for lunch in South Kensington. These sessions were always great fun and involved an extended lunch hour. The talk was about everything and anything with a hefty dose of science for good measure..." His close friends John Pickett and Ross Donald in Australia would say after his death, "We have many memories of Brian that we cherish: of trips into the Australian wilderness; of spending a freezing couple of days at Christmas camping in the highest part of Australia; of squash games; ...of scuba dives at different places; of the beautiful watercolours of Australian ground orchids he painted and gave to us; and of course his enviable skill at the piano, when the house rang with his music..."

During 1991–1995, he led the Museum's Department of Invertebrate Zoology as chairman. Even after his tenure as chairman, people came into Brian's office for advice and council. He had obvious integrity and objectivity, a kind of natural leader quality that earned him great respect and the confidence of top museum administrators. Many of us have lost a mentor as well as an invaluable colleague.

During a twenty-five year tenure at NMNH, Brian served as editor of the *Proceedings of the Biological Society of Washington* (1981–1989) and president of the society from 2000 to 2002, as well as member of the editorial board of the *Atoll Research Bulletin* (1994–2004). During 1990–1992, he was director of the American Association for Zoological Nomenclature and concurrently the Smithsonian Institution Representative to the Seychelles Islands Foundation (1984–2004). In addition, Brian served as a scientific advisor to the World Bank, U.S. Department of State, Environmental Protection Administration, the National Academy of Sciences, and U.S. Agency for International Development.

In his own words, Brian felt that in his post at NMNH it was his "aim over more than 20 years of research to take a major group of speciose crustaceans and document this group as thoroughly as possible... Concurrent with this aim has been my attempt to make such knowledge in usable form to the non-specialist student and applied biologist,

driven by my belief that this is one of the prime responsibilities of the biological systematist ... achieved mainly in the form of published keys and field guides." His legacy includes descriptions of a new family of isopods, 52 new genera, and 464 species of crustaceans and mollusks that are new to science, some co-authored.

According to his fellow isopodologist, Dr. Gary Poore of the Museum of Victoria, Melbourne, Australia, "Taxonomists take various approaches to their discipline. Faced with a hugely diverse fauna of isopods in the environments he sampled, Brian concentrated on getting them described and named. The resulting body of work is an essential basis for evolutionary studies, a subject he left largely for others... The most valuable evidence of his grasp of the literature, his ability to collaborate with others, and his dedication to synthesis is the web-based families, genera and species, and bibliography of the world's isopods."

Dr. Niel Bruce (National Institute of Water and Atmospheric Research, Wellington, New Zealand) recalls, "Brian's early publications appeared when I was doing my Bachelor's degree. It was during my Honour's year, working on the taxonomy of some Western Indian Ocean isopods, that I saw the first of many well-illustrated papers on South African isopods. From those early days I always had a rush of curiosity when opening a packet of reprints from Brian, impatient to see what new and interesting isopods he had described together with his career-long colleague Marilyn Schotte.

"Brian had a near encyclopaedic knowledge of the Isopoda, and a huge knowledge of the Crustacea. This is reflected in the breadth of his taxonomic publications, describing marine isopods from all the suborders, as well as substantial and significant contributions on decapod crustaceans. Brian made a great contribution to our knowledge of the marine isopods, particularly those of the Western Indian Ocean, a region in which we shared a strong interest, and perhaps his favourite working area.

"Wheeler (2004) writes cogently of the urgent need for more documentary taxonomy, and it is timely to remember that if new species are not described then they cannot be included in phylogenetic, biogeographic or diversity analyses. Describing species is fundamental to modern biology, and it is in that discipline that Brian Kensley made a great contribution to modern biology.

"Research taxonomists work in different ways. A primary motivation is intense curiosity and, for many taxonomists, the joy of discovery. There was and is no one who could work as widely and accurately as Brian, and that perhaps was his great strength as a documentary taxonomist. It is pertinent to know what exists, and Brian evidently enjoyed describing new species. Brian never lost his natural enthusiasm for discovery, and saw the need for sustained documentation of the 'units of biodiversity': previously unknown species."

Wheeler, Q. D. 2004. Taxonomic triage and the poverty of phylogeny.— *Philosophical Transactions of the Royal Society of London* 359: 571–583.

In his later years, Brian's research interests turned toward the taxonomy of thalassinidean shrimps of the world. At the

time of his death, Brian was preparing several papers on sergestid shrimp and was in the middle of a large project involving the cladistic analysis of the shrimps of the peneoid superfamily.

It was personally my great privilege to have worked alongside Brian for twenty-three years. In recognition of his many contributions to marine biology, several colleagues named species for him in a variety of taxa, as follows:

*Steinmanella kensleyi* Cooper, 1979, fossil mollusk  
*Zophosis kensleyi* Penrith, 1981, fossil mollusk  
*Colanthurus kensleyi* Poore, 1984, isopod  
*Mexicope kensleyi* Hooker, 1985, isopod  
*Gordonella kensleyi* Crosnier, 1985, amphipod  
*Nagurus kensleyi* Ferrara and Taiti, 1985, terrestrial isopod  
*Plesionika kensleyi* Chace, 1985, shrimp  
*Heteromysis kensleyi* Modlin, 1987, mysid  
*Nymphon kensleyi* Child, 1988, pycnogonid  
*Spiniphiline kensleyi* Gosliner, 1988, nudibranch  
*Austromegabalanus kensleyi* Pether, 1990, barnacle  
*Skuphonura kensleyi* Brusca and Müller, 1991, isopod  
*Procambarus (Giardiella) kensleyi* Fitzpatrick and Suttkus, 1992, crayfish  
*Eurydice kensleyi* Bruce and Soares, 1996, isopod  
*Listriella kensleyi* Ortiz and Lalana, 1996, amphipod  
*Oxinaspheera kensleyi* Bruce, 1997, isopod  
*Sergia kensleyi* Vereshchaka, 2001, shrimp  
*Cyclaspis kensleyi* Petrescu, 2002, cumacean  
*Heptanthurus kensleyi* Poore and Lew Ton, 2002, isopod  
*Neoarcturus kensleyi* Poore, 2003, isopod

In 1981, Dr. Johann Wägele erected the genus name *Kensleyanthura* in which to place an isopod from South Africa, but Brian had to sink his namesake in 1982 as he revised several genera in the family Anthuridae, synonymizing it with the genus *Kupellonura*. A special volume of the *Proceedings of the Biological Society of Washington*, volume 118 (1) to appear in 2005, will be dedicated to Brian and will include some 20 more names to add to this list.

#### PUBLICATIONS OF BRIAN F. KENSLEY

- Grindley, J. R., and B. Kensley. 1966. Benthonic marine fauna obtained off the mouth of the Orange River by the diamond dredger Emerson-K.—*Cimbebasia* 16: 3–14.
- Kensley, B. 1968a. *Pseudione elongata africana*, a new subspecies of bopyrid isopod from the west coast of the Cape Peninsula, South Africa.—*Crustaceana* 15: 188–192.
- . 1968b. Deep sea decapod Crustacea from west of Cape Point, South Africa.—*Annals of the South African Museum* 50: 283–323.
- . 1969. Decapod Crustacea from the south-west Indian Ocean.—*Annals of the South African Museum* 52: 149–181.
- Carrington, A. J., and ———. 1969. Pleistocene molluscs from the Namaqualand coast.—*Annals of the South African Museum* 52: 189–223.
- . 1970a. *Cancerilla tubulata* Dalyell from South West Africa. (Copepoda, Cyclopoid).—*Crustaceana* 18: 111.
- . 1970b. A new species of *Caligus* from South West Africa (Copepoda, Caligidae).—*Crustaceana* 18: 167–172.
- . 1970c. Some decapod Crustacea from northern South West Africa, including a new species of *Hippolyte*.—*Cimbebasia* (A) 1: 179–188.
- . 1970d. The occurrence of *Grapsus grapsus tenuicratus* (Herbst) at the Tsitsikama Coastal National Park (Decapoda, Brachyura, Grapsidae).—*Koedoe* 13: 127–130.
- . 1970e. A small collection of decapod Crustacea from Mozambique.—*Annals of the South African Museum* 57: 103–122.
- , and M.-L. Penrith. 1970a. New records of Mytilidae from the northern South West African Coast.—*Annals of the South African Museum* 57: 15–24.
- , and M.-L. Penrith. 1970b. The status of *Gregariella simplicifilis* Barnard, with records of Mytilidae from southern Angola.—*Annals of the South African Museum* 57: 123–130.
- Penrith, M.-L., and ———. 1970a. The constitution of the intertidal fauna of rocky shores of South West Africa. Part I. Luderitzbucht.—*Cimbebasia* (A) 1: 191–239.
- Penrith, M.-L., and ———. 1970b. The constitution of the intertidal fauna of rocky shores of South West Africa. Part II. Rocky Point.—*Cimbebasia* (A) 1: 243–268.
- . 1971a. Amphipoda from southern Angola.—*Annals of the South African Museum* 57: 149–156.
- . 1971b. A new eubranchiata sphaeromid isopod from Angola.—*Cimbebasia* (A) 2: 37–42.
- . 1971c. Termitophilous isopods from southern Africa.—*Annals of the South African Museum* 57: 131–147.
- . 1971d. The family Sergestidae in the waters around southern Africa (Crustacea, Decapoda, Natantia).—*Annals of the South African Museum* 57: 215–264.
- . 1971e. The genus *Gennadas* in the waters around southern Africa.—*Annals of the South African Museum* 57: 271–294.
- . 1972a. Behavioural adaptations of *Tylos granulatus* Krauss.—*Zoologica Africa* 7(1): 1–4.
- . 1972b. Shrimps and Prawns of Southern Africa. South African Museum: Cape Town. 65 pp.
- . 1972c. Pliocene marine invertebrates from Langebaanweg, Cape Province.—*Annals of the South African Museum* 60: 173–190.
- , and M.-L. Penrith. 1972d. *Monodonta (Oxysteles) fulgurata* Philippi, a synonym of *Oxysteles variegata* (Anton).—*Journal of Conchology* 27: 349–352.
- . A new species of hermit crab from Natal, South Africa (Decapoda, Anomura, Paguridae).—*Durban Museum Novitates* 9: 285–290.
- . Sea Shells of Southern Africa: Gastropods. Cape Town: South African Museum and Maskew Miller. 225 pp.
- . A new species of *Clausidium* from South Africa (Copepoda, Clausidiidae).—*Crustaceana* 27: 154–158.
- , and J. R. Grindley. 1973. South African Parasitic Copepoda.—*Annals of the South African Museum* 62: 69–130.
- , and M.-L. Penrith. 1973. The constitution of the intertidal fauna of rocky shores of Mocamedes, southern Angola.—*Cimbebasia* (A) 2: 113–123.
- . 1974a. Bopyrid Isopoda from South Africa.—*Crustaceana* 26: 259–266.
- . 1974b. Aspects of the biology and ecology of the genus *Tylos* Latreille.—*Annals of the South African Museum*, 65: 401–471.
- . 1974a. Type specimens of Decapoda (Crustacea) in the collections of the South African Museum.—*Annals of the South African Museum* 66: 55–80.
- . 1974b. The genus *Callianassa* (Crustacea, Decapoda, Thalassinidea) from the west coast of South Africa, with a key to the South African species.—*Annals of the South African Museum* 62: 265–278.
- . 1974c. The status of the Plio-Pleistocene *Panopea* in southern Africa (Mollusca, Bivalvia, Hiatellidae).—*Annals of the South African Museum* 65: 199–215.
- . 1975a. Taxonomic status of the pygocephalomorphic Crustacea from the Dwyka ‘White Band’ (Permo-Carboniferous) of South Africa.—*Annals of the South African Museum* 67: 25–33.
- . 1975b. Marine Isopoda from the continental shelf of South Africa.—*Annals of the South African Museum* 67: 35–89.
- . 1975c. Five species of *Jaeropsis* from the southern Indian Ocean (Crustacea, Isopoda, Asellota).—*Annals of the South African Museum* 67: 367–380.
- . 1975d. A new species of anthurid isopod from the Cape.—*Zoologica Africana* 10: 209–213.
- . 1975e. Records of mud-prawns (genus *Callianassa*) from South Africa and Mauritius (Crustacea, Decapoda, Thalassinidea).—*Annals of the South African Museum* 69: 47–58.
- . 1976a. The genus *Nebalia* in South and South West Africa (Crustacea Leptostraca).—*Cimbebasia* (A) 4: 155–162.
- . 1976. Isopodan and tanaidacean Crustacea from the St. Paul and Amsterdam Islands, southern Indian Ocean.—*Annals of the South African Museum* 69: 261–323.
- . 1977a. New records of marine Crustacea Isopoda from South Africa.—*Annals of the African Museum* 72: 239–265.
- . 1977b. *Lambrachaeus ramifer* Alcock, a rare spider crab from the east coast of southern Africa (Decapoda, Brachyura, Majidae).—*Zoologica Africana* 12: 323–327.

- . 1977c. The South African Museum's *Meiring Naude* Cruises. Part 2. Crustacea, Decapoda, Anomura and Brachyura.—Annals of the South African Museum 72: 161–188.
- . 1977d. The South African Museum's *Meiring Naude* Cruises. Part 5. Crustacea, Decapoda, Reptantia and Natantia.—Annals of the South African Museum 74: 13–44.
- . 1977e. A second assemblage of Pliocene invertebrate fossils from Langebaanweg, Cape.—Annals of the South African Museum 72: 189–210.
- . 1977f. *Panopea glycymeris* (Mollusca, Pelecypoda) in the South African faunal province.—Zoologica Africana 12: 236–237.
- , and M. J. Penrith. 1977. Biological survey of Sandvis 1; Introduction and Faunal List.—Madoqua 10: 181–190.
- . 1978a. Interaction between coastal processes and lagoonal fauna, between Walvis Bay and Luderitzbucht, South West Africa.—Madoqua 11: 55–60.
- . 1978b. Guide to the Marine Isopods of Southern Africa. Cape Town: South African Museum. 173 pages.
- . 1978c. Two new species of the genus *Pseudanthura* Richardson (Crustacea: Isopoda: Anthuridae).—Proceedings of the Biological Society of Washington 91: 222–233.
- . 1978d. A new genus and species of anthurid isopod from deep water off the east coast of the United States.—Proceedings of the Biological Society of Washington 91: 558–562.
- . 1978e. Five new genera of anthurid isopod crustaceans.—Proceedings of the Biological Society of Washington 91: 775–792.
- . 1978f. The South African Museum's *Meiring Naude* Cruises. Part 7. Marine Isopoda.—Annals of the South African Museum 74: 125–157.
- . 1978g. Redescription of *Parabathynomus natalensis* Barnard (Crustacea, Isopoda, Cirolanidae).—Annals of the South African Museum 75: 25–31.
- . 1978h. A new marine isopod family from the south-western Indian Ocean.—Annals of the South African Museum 75: 41–50.
- . 1978i. The South African Museum's *Meiring Naude* Cruises. Part 8. Isopoda Anthuridae.—Annals of the South African Museum 77: 1–25.
- . 1978j. Decapod crustaceans collected in southern African waters by the Th. Mortensen Java–South Africa Expedition (Crustacea, Decapoda).—Steenstrupia 4: 249–261.
- , and H. W. Kaufman. 1978. *Cleantoides*, a new idoteid genus from Baja California and Panama.—Proceedings of the Biological Society of Washington 91: 658–665.
- . 1979a. A second genus in the marine isopod family Bathynataliidae.—Annals of the South African Museum 79: 35–41.
- . 1979b. Redescription of *Haliophasma barnardi* (Monod) from West Africa Crustacea: Isopoda: Anthuridae).—Proceedings of the Biological Society of Washington 92: 658–664.
- . 1979c. Redescription of *Zonophryxus trilobus* Richardson, with notes on the male and developmental stages (Crustacea: Isopoda: Dajidae).—Proceedings of the Biological Society of Washington 92: 665–670.
- . 1979d. New species of anthurideans from the Cook and Fiji Islands (Crustacea: Isopoda: Anthuridae).—Proceedings of the Biological Society of Washington 92: 814–836.
- , and M. L. Koenig. 1979. Two new species of *Quantanthura* from Brazil (Crustacea, Isopoda, Anthuridae).—Proceedings of the Biological Society of Washington 91: 953–962.
- . 1980a. A new species of *Munna* Kroyer from Nigeria (Crustacea: Isopoda: Asellota).—Proceedings of the Biological Society of Washington 93: 136–140.
- . 1980b. Records of anthurids from Florida, Central America, and South America Crustacea: Isopoda: Anthuridae).—Proceedings of the Biological Society of Washington 93: 725–742.
- . 1980c. Marine isopods from Marion, Prince Edward, and Crozet Islands (Crustacea, Isopoda).—Annals of the South African Museum 82: 155–185.
- . 1980d. Decapod and isopod crustaceans from the west coast of southern Africa, including seamounts Vema and Tripp.—Annals of the South African Museum 83: 13–32.
- . 1980e. Anthuridean isopod crustaceans from the International Indian Ocean Expedition, 1960–1965, in the Smithsonian collections.—Smithsonian Contributions to Zoology 304: 1–37.
- , and M.-L. Penrith. 1980. The constitution of the fauna of rocky intertidal shores of South West Africa. Part III. The north coast from False Cape Frio to the Kunene River.—Cimbebasia (A) 5: 201–214.
- . 1981a. *Curassanthura halma* a new genus and species of interstitial isopod from Curaçao, West Indies (Crustacea: Isopoda: Paranthuridae).—Bijdragen tot de Dierkunde 51: 131–134.
- . 1981b. Notes on *Axiopsis (Axiopsis) serratifrons* (A. Milne Edwards) (Crustacea: Decapoda: Thalassinidea).—Proceedings of the Biological Society of Washington 93: 1253–1263.
- . 1981c. The South African Museum's *Meiring Naude* Cruises. Part 12. Crustacea Decapoda of the 1977, 1978, and 1979 cruises.—Annals of the South African Museum 83: 49–78.
- . 1981d. On the zoogeography of southern African decapod Crustacea, with a distributional checklist of the species.—Smithsonian Contributions to Zoology 338: 1–64.
- , and R. H. Gore. 1981. *Coralaxius abelei*, new genus and new species (Crustacea: Decapoda: Thalassinidea: Axiidae): a coral-inhabiting shrimp, from the Florida Keys and the western Caribbean.—Proceedings of the Biological Society of Washington 93: 1277–1294.
- Poore, G. C. B., and ———. 1981. *Coralanthura* and *Sauranthura*, two new genera of anthurideans from northeastern Australia (Crustacea: Isopoda: Anthuridae).—Proceedings of the Biological Society of Washington 94: 503–513.
- . 1982a. Revision of the southern African Anthuridea (Crustacea, Isopoda).—Annals of the South African Museum 90: 95–200.
- . 1982b. Anthuridea (Crustacea: Isopoda) of Carrie Bow Cay, Belize. Pp. 321–353 in Ruetzler and McIntyre, eds. The Atlantic Barrier Reef Ecosystem at Carrie Bow Cay, Belize, 1: Structure and Communities.—Smithsonian Contributions to Marine Sciences 12. 539 pp.
- . 1982c. Deep-water Atlantic Anthuridea (Crustacea, Isopoda).—Smithsonian Contributions to Zoology 346: 1–60.
- . 1982d. *Prethura hutchingsae* a new genus and species of Asellote isopod from the Great Barrier Reef, Australia (Crustacea: Isopoda: Pleurocopidae).—Journal of Crustacean Biology 2: 255–260.
- , and G. C. B. Poore. 1982. Anthurids from the Houtman Abrolhos Islands, Western Australia (Crustacea: Isopoda: Anthuridae).—Proceedings of the Biological Society of Washington 95: 625–636.
- , and I. Walker. 1982. Palaemonid shrimps from the Amazon Basin, Brazil Crustacea: Decapoda: Natantia).—Smithsonian Contributions to Zoology 362: 1–28.
- Lewis, S. M., and ———. 1982. Notes on the ecology and behaviour of *Pseudamphithoides incurvaria* (Just) (Crustacea, Amphipoda, Amphithoidae).—Journal of Natural History 16: 267–274.
- . 1983a. Biogeographical relationships of some southern African benthic Crustacea.—Memoirs of the Australian Museum 18: 173–181.
- . 1983b. New records of bresiliid shrimps from Australia, South Africa Caribbean, and Gulf of Mexico (Decapoda: Natantia: Caridea).—Smithsonian Contributions to Zoology 394: 1–31.
- . 1983c. *Astacilla* Cordiner, 1793 (Crustacea, Isopoda): proposed nomenclatural validation by use of plenary powers Z.N.(S)2319.—Bulletin of Zoological Nomenclature 40: 163–164.
- . 1984a. The role of isopod crustaceans in the reef crest community at Carrie Bow Cay, Belize.—Marine Ecology 5: 29–44.
- . 1984b. The South African Museum's *Meiring Naude* Cruises. Part 15. Marine Isopoda of the 1977, 1978, 1979 cruises.—Annals of the South African Museum 93: 213–301.
- . 1984c. The Atlantic Barrier Reef Ecosystem at Carrie Bow Cay, Belize, III: New Marine Isopoda.—Smithsonian Contributions to Marine Sciences 24: 1–81.
- , and C. D. Buxton. 1984. Inshore small-mesh trawling survey of the Cape south coast. Part 5. Crustacea, Stomatopoda, Isopoda and Decapoda.—South African Journal of Zoology 19: 189–193.
- Cooper, M. R., and ———. 1984. Endemic South American Permian Bivalve Molluscs from the Ecça of South Africa.—Journal of Paleontology 58: 1360–1363.
- , and J. Reid. 1984. *Arabanthura enigmatica*, a new genus and species of anthurid isopod from the Arabian Gulf.—Proceedings of the Biological Society of Washington 97: 674–680.
- , and M. Schotte. 1984. Redescription of *Arcturella lineata* (Stebbing) from South Africa (Crustacea: Isopoda: Arcturidae).—Proceedings of the Biological Society of Washington 97: 240–244.
- Reinthal, P. N., ———, and S. M. Lewis. 1984. Dietary shifts in the Queen Triggerfish, *Balistes vetula*, in the absence of its primary food item, *Diadema antillarum*.—Marine Ecology 5: 191–195.
- . 1985a. Cementing bivalve molluscs of the genus *Chlamys* ('*Hinnites*') in southern Africa.—South African Journal of Science 81: 629–631.

- . 1985b. The fossil occurrence in southern Africa of the South American intertidal mollusc *Concholepas concholepas*.—*Annals of the South African Museum* 97: 1–7.
- . 1985c. The faunal deposits of a Late Pleistocene raised beach at Milnerton, Cape Province, South Africa.—*Annals of the South African Museum* 95: 111–122.
- , and R. W. Heard. 1985. A new species of the genus *Spinianirella* Menzies (Crustacea: Isopoda: Janiridae) from the western Atlantic.—*Proceedings of the Biological Society of Washington* 98: 682–686.
- Pérez Farfante, I., and ———. 1985. *Cryptopenaeus crosnieri*, a new species of shrimp, and a new record of *C. sinensis* (Penaeoidea: Solenoceridae) from Australian waters.—*Proceedings of the Biological Society of Washington* 98: 281–287.
- , and W. Tobias. 1985. Redescription of *Heterocarpus laevis* A. Milne Edwards (Crustacea: Decapoda: Pandalidae).—*Proceedings of the Biological Society of Washington* 98: 237–242.
- , and C. A. Child. 1986. A new species of *Enoplometopus* (Thalassinidea: Axiidae) from the Northern Philippines.—*Journal of Crustacean Biology* 6: 520–524.
- , and J. Pether. 1986. Late Tertiary and Early Quaternary fossil Mollusca of the Hondeklip area, Cape Province, South Africa.—*Annals of the South African Museum* 97: 141–225.
- , and D. Williams. 1986. New shrimps (Families Procarididae and Atyidae) from a submerged lava tube on Hawaii.—*Journal of Crustacean Biology* 6: 417–437.
- . 1987a. A re-evaluation of the systematics of K. H. Barnard's review of anthuridean isopods.—*Steenstrupia* 13: 101–139.
- . 1987b. Further records of marine isopod crustaceans from the Caribbean.—*Proceedings of the Biological Society of Washington* 100: 559–577.
- . 1987c. *Harrieta*, a new genus for *Cymodoce faxoni* (Richardson) (Crustacea: Isopoda: Sphaeromatidae).—*Proceedings of the Biological Society of Washington* 100: 1036–1039.
- , and M. Schotte. 1987. New records of isopod Crustacea from the Caribbean, the Florida Keys, and the Bahamas.—*Proceedings of the Biological Society of Washington* 100: 216–247.
- , and P. Snelgrove. 1987. Records of marine isopod crustaceans associated with the coral *Madracis mirabilis* from Barbados.—*Proceedings of the Biological Society of Washington* 100: 186–197.
- , H. A. Tranter, and D. J. G. Griffin. 1987. Deepwater decapod Crustacea from eastern Australia (Penaeoidea and Caridea).—*Records of the Australian Museum* 39: 263–331.
- . 1988a. Preliminary observations on the isopod crustacean fauna of Aldabra Atoll.—*Bulletin of the Biological Society of Washington* No. 8: 40–44.
- . 1988b. New species and records of cave shrimps from the Yucatan Peninsula (Decapoda: Agostocarididae and Hippolytidae).—*Journal of Crustacean Biology* 8: 688–699.
- , and George M. Simmons, Jr. 1988. *Axiorygma nethertoni*, a new genus and species of thalassinidean shrimp from Florida (Decapoda: Axiidae).—*Journal of Crustacean Biology* 8: 657–667.
- . 1989a. Marine isopods from the St. Paul and Amsterdam Islands, southern Indian Ocean.—*Bulletin du Museum national d'Histoire naturelle*, Paris (4)11(A): 147–164.
- . 1989b. New genera in the thalassinidean families Calocarididae and Axiidae (Crustacea: Decapoda).—*Proceedings of the Biological Society of Washington* 102: 960–967.
- , and M. Schotte. 1989. Guide to the Marine Isopod Crustaceans of the Caribbean. Smithsonian Institution Press, Washington and London. 308 pp.
- , and R. W. Heard. 1990. The genus *Axianassa* (Crustacea: Decapoda: Thalassinidea) in the Americas.—*Proceedings of the Biological Society of Washington* 103: 558–572.
- , and A. B. Williams. 1990. *Axiopsis eximia*, a new thalassinidean shrimp (Crustacea Decapoda, Axiidae) from the Middle Eocene of South Carolina.—*Journal of Paleontology* 64: 798–802.
- Branch, M. L., C. L. Griffiths, ———, and J. Sieg. 1991. The benthic Crustacea of subantarctic Marion and Prince Edward Islands: illustrated keys to the species and results of the 1982–1989 University of Cape Town Surveys.—*South African Journal of Antarctic Research* 21: 3–44.
- Cooper, M. R., and ———. 1991. An early Pleistocene decapod crustacean fauna from Zululand.—*South African Journal of Science* 87: 601–604.
- , and R. W. Heard. 1991a. Studies on the Crustacea of the Turks and Caicos Islands, British West Indies. I. Four new marine isopod crustaceans from the vicinity of Pine Cay.—*Gulf Research Reports* 8: 237–246.
- , and R. W. Heard. 1991b. An examination of the shrimp family Callianideidae (Crustacea: Decapoda: Thalassinidea).—*Proceedings of the Biological Society of Washington* 104: 493–537.
- Rodrigues, S. de A., and ———. 1991. *Eutrichocheles pindatyba*, a new axiid shrimp (Crustacea: Decapoda: Thalassinidea) from Brazil.—*Proceedings of the Biological Society of Washington* 103: 556–560.
- Schotte, M., R. W. Heard, and ———. 1991. Studies on the Crustacea of the Turks and Caicos Islands, British West Indies. III. Records of marine Isopoda from Pine Cay, Fort George Cay, Water Cay, and adjacent waters.—*Gulf Research Reports* 8: 251–257.
- . 1992. New records of interstitial Anthuridea including *Curassanthura*, from the Western Atlantic (Crustacea: Isopoda).—*Stygologia* 7: 187–192.
- Chace, F. A., Jr., and ———. 1992. The cardiac notch in decapods.—*Journal of Crustacean Biology* 12: 442–447.
- , and T. Komai. 1992. Redescription of *Calocarides soyoi* (Yokoya, 1933) from Japan (Crustacea: Decapoda: Axiidae).—*Proceedings of the Biological Society of Washington* 105: 81–85.
- . 1993. Marine Biological Research and the Natural Science Museum. Pp. 51–55 in *Proceedings of the International Symposium held at The National Museum of Natural Science, Taichung, Taiwan*.
- . 1994a. Records of shallow-water marine isopods from Bermuda with descriptions of four new species.—*Journal of Crustacean Biology* 14: 319–336.
- . 1994b. Redescription of *Iais elongata* Sivertsen & Holthuis, 1980 from the South Atlantic Ocean (Crustacea: Isopoda: Asellota).—*Proceedings of the Biological Society of Washington* 107: 274–282.
- . 1994c. The genus *Coralaxius* redefined, with the description of two new species (Crustacea: Decapoda: Axiidae).—*Journal of Natural History* 28: 813–828.
- , and M. Schotte. 1994a. A new genus and species of Cirolanid isopod from the Western Indian Ocean (Crustacea: Peracarida).—*Proceedings of the Biological Society of Washington* 107: 283–290.
- , and M. Schotte. 1994b. Marine isopods from the Lesser Antilles and Colombia (Crustacea: Peracarida).—*Proceedings of the Biological Society of Washington* 107: 482–510.
- . 1995. *Namibianira*, a new genus of aquatic cave-dwelling isopod from Namibia (Crustacea: Isopoda: Asellota).—*Cimbebasia* 14: 1–15.
- , W. G. Nelson, and M. Schotte. 1995. Marine isopod biodiversity of the Indian River Lagoon, Florida.—*Bulletin of Marine Science* 57: 136–142.
- . 1996a. The genus *Paraxiopsis* de Man, with descriptions of new species from the Western Atlantic (Crustacea: Decapoda: Axiidae).—*Bulletin of Marine Science* 58: 709–729.
- . 1996b. New species of Calocarididae from the Caribbean Sea and Gulf of Mexico (Crustacea: Decapoda: Thalassinidea).—*Bulletin of Marine Science* 59: 158–168.
- . 1996c. A new species of the axiid shrimp genus *Acanthaxius* from the Caribbean (Crustacea: Decapoda: Axiidae).—*Proceedings of the Biological Society of Washington* 109: 70–74.
- . 1996d. Systematics and distribution of the genus *Calocarides* (Crustacea: Decapoda: Axiidae).—*Proceedings of the Biological Society of Washington* 109: 53–69.
- . 1996e. New thalassinidean shrimp from the Pacific Ocean (Crustacea: Decapoda: Axiidae and Calocarididae).—*Bulletin of Marine Science* 59: 469–489.
- . 1996f. The genus *Ptilanthura* in the western Atlantic: evidence for primary males and description of a new species (Isopoda: Anthuridae).—*Journal of Crustacean Biology* 16: 763–781.
- , and M. Bursey. 1996. Rediscovery of *Cymodocella algoense* from South Africa (Crustacea: Isopoda: Sphaeromatidae).—*Proceedings of the Biological Society of Washington* 109: 91–96.
- . 1997. Identification, distribution, and aspects of the biology of ten anthuridean isopod species from the shallow continental shelf of the U.S. gulf and east coast.—*Gulf Research Reports* 9: 277–302.
- , and R. W. Heard. 1997. *Tridentella ornata* (Richardson, 1911), new combination: records of hosts and localities (Crustacea: Isopoda: Tridentellidae).—*Proceedings of the Biological Society of Washington* 110: 422–425.
- , M. Ortiz, and M. Schotte. 1997. New records of marine Isopoda from Cuba (Crustacea: Peracarida).—*Proceedings of the Biological Society of Washington* 110: 74–98.

- Pérez Farfante, I., and ———. 1997. Penaeoid and sergestoid shrimps and prawns of the world. Keys and diagnoses for the families and genera.—*Memoires du Museum national d'Histoire naturelle, Paris* 175: 1–233.
- . 1998. Estimates of species diversity of free-living marine isopod crustaceans on coral reefs.—*Coral Reefs* 17: 83–88.
- , and T.-Y. Chan. 1998. Three new species of thalassinidean shrimps (Crustacea, Axiidae and Calocarididae) from Taiwan.—*Zoosystema* 20: 255–264.
- , and K. Clark. 1998. A new isopod species from Key Largo, Florida (Crustacea: Isopoda: Holognathidae).—*Proceedings of the Biological Society of Washington* 111: 314–319.
- Bolstad, K., and ———. 1999. Two new species of *Hansenium* (Crustacea: Isopoda: Asellota) from Madang, Papua New Guinea.—*Proceedings of the Biological Society of Washington* 112: 164–174.
- , and M. Schotte. 1999. New records of isopods from the Indian River Lagoon, Florida (Crustacea: Peracarida).—*Proceedings of the Biological Society of Washington* 112: 695–713.
- Lin, F.-J., ———, and T.-Y. Chan. 2000. The rare axiid genus *Oxyrhynchaxius* Parisi, 1917 (Decapoda: Thalassinidea) with a description of a new species from Australia.—*Journal of Crustacean Biology* 20: 199–206.
- , J. Lin, and H.-P. Yu. 2000. Further records of thalassinidean shrimps from Taiwan (Decapoda: Axiidae and Calocarididae), with descriptions of three new species.—*Journal of Crustacean Biology* 20: 207–217.
- , and M. Schotte. 2000. New species and records of anthuridean isopod crustaceans from the Indian Ocean.—*Journal of Natural History* 34: 2057–2121.
- . 2001a. Biogeography of the marine Isopoda of the Indian Ocean, with a check-list of species and records.—*Crustacean Issues* 13: 205–264.
- . 2001b. Two sympatric species of *Axius* from the North-West Atlantic (Decapoda, Thalassinidea, Axiidae).—*Crustaceana* 74: 951–962.
- . 2001c. A new species of *Corallichirus* Manning, 1992 (Crustacea: Decapoda: Callianassidae) from Guam.—*Bulletin of the Biological Society of Washington* 10: 328–333.
- . 2001d. Chapter 3, Isopoda; Chapter 4, Spelaeogriphacea; Chapter 5, Tanaidacea. In Day, Stewart, de Moor, and Louw, eds. *Guides to the Freshwater Invertebrates of Southern Africa*, vol. 4: Crustacea III. Water Research Commission, Pretoria, South Africa. 144 pp.
- , and N. L. Bruce. 2001. Redescription of *Dynameniscus carinatus* (Richardson, 1900) (Crustacea: Isopoda: Sphaeromatidae).—*Proceedings of the Biological Society of Washington* 114: 188–196.
- , and R. Brusca (Editors). 2001. *Isopod Systematics and Evolution*. In R. Vonk and F. Schram, *Crustacean Issues* 13. A. A. Balkema, Rotterdam. 357 pp.
- , and T.-Y. Chan. 2001. Two species of deep-sea flabelliferan isopods from Taiwan (Crustacea: Peracarida: Aegidae, Anuropidae).—*Journal of Natural History* 35: 481–496.
- , and C. P. Hickman. 2001. A new species of *Calaxius* Sakai & de Saint Laurent, 1989, from the Galapagos Islands (Crustacea: Decapoda: Axiidae).—*Proceedings of the Biological Society of Washington* 114: 484–488.
- , and M. Schotte. 2002. New species and records of Asellota from the Indian Ocean (Crustacea: Peracarida: Isopoda).—*Journal of Natural History* 36: 1421–1461.
- . 2003a. Axioid shrimps from Guam (Crustacea, Decapoda, Thalassinidea).—*Micronesica* 35–36: 361–386.
- . 2003b. Marine isopod crustaceans from Easter Island.—*Pacific Science* 57: 287–317.
- , and J. E. Cartes. 2003. Records and distribution of *Syscenus infelix* in the deep Mediterranean (Crustacea: Isopoda: Aegidae).—*Journal of the Marine Biological Association of the United Kingdom* 83: 775–777.
- . 2004. Redescription and distribution of two species of *Syscenus* (Crustacea: Isopoda: Aegidae) in the North Atlantic.—*Sarsia* 89: 160–174.
- Felder, D. F., and ———. 2004. A new species of axiid shrimp from chemosynthetic communities of the Louisiana continental slope, Gulf of Mexico (Crustacea: Decapoda: Thalassinidea).—*Proceedings of the Biological Society of Washington* 117: 68–75.
- Schotte, M., and ———. In Press. New species and records of Flabellifera from the Indian Ocean (Crustacea: Peracarida: Isopoda).—*Journal of Natural History*.
- , and M. Schotte. In Press. New species and records of Gnathiidea and Valvifera isopods (Crustacea: Peracarida: Isopoda) from the Indian Ocean.—*Journal of Natural History*.

## LIST OF TAXA NAMED BY BRIAN F. KENSLEY

Taxa are listed alphabetically within each group. Holotype deposition and registration number is given for all species. Abbreviations for repositories are as follows: AM, Australian Museum, Sydney, Australia; AMNH, American Museum of Natural History, New York; BM, British Museum (Natural History), London; INPA, Instituto Nacional de Pesquisas da Amazonia, Manaus, Brazil; IO, Instituto de Oceanologia, Havana, Cuba; MZUSP, Museu de Zoologia, Universidade de São Paulo, Brazil; NMNS, National Museum of Natural Sciences, Ottawa, Canada; NMV, National Museum of Victoria, Melbourne, Australia; NTOU, National Taiwan Ocean University; USNM, National Museum of Natural History, Smithsonian Institution, Washington, D.C.; SAM, South African Museum, Cape Town, South Africa; SMN, State Museum, Windhoek, Namibia; YPM, Yale Peabody Museum, New Haven, Connecticut; ZMA, Zoological Museum, Amsterdam, Netherlands; ZMUC, Zoologisk Museum, Copenhagen, Denmark.

## CRUSTACEA

## Amphipoda

*Pleonexes macrocornutus* Kensley, 1971a; SAM A12837

## Anomura

*Munidopsis barnardi* Kensley, 1968b; SAM A12636  
*Munidopsis chacei* Kensley, 1968b; SAM A10470  
*Parapagurus kilburni* Kensley, 1973a; SAM A13185  
*Uroptychus foulsi* Kensley, 1977c; SAM A15336

## Brachyura

*Cryptodromiopsis mortenseni* Kensley, 1978j; ZMUC  
*Ethusa sinespina* Kensley, 1969a; SAM A12648  
*Macropodia cirripilus* Kensley, 1980d; SAM A16791  
*Palicus sexlobatus* Kensley, 1969a; SAM A12642  
*Paralomis roeleveldae* Kensley, 1981c; SAM A16045  
*Petalomera laevis* Kensley, 1970e; SAM A12824  
*Pseudodromia cacuminis* Kensley, 1980d; SAM A16787  
*Pseudodromia trepidus* Kensley, 1978j; ZMUC  
*Retropluma planiforma* Kensley, 1969a; SAM A12644  
*Uroptychus edwardi* Kensley, 1981c; SAM A16033

## Caridea

*Agostocaris bozanici* Kensley, 1988b; USNM 211443  
*Alpheus nonalter* Kensley, 1969a; SAM A12650  
*Alpheus waltervadi* Kensley, 1969a; SAM A12646  
*Crosniera* Kensley and Heard, 1991b  
*Discias brownae* Kensley, 1983b; AM P33772  
*Glyphocrangon holti* Kensley, Tranter, and Griffin, 1988; AM P35906  
*Glyphocrangon lowryi* Kensley, Tranter, and Griffin, 1988; AM P33158  
*Glyphocrangon novacastellum* Kensley, Tranter, and Griffin, 1988; AM P26766  
*Halocaridina palahemo* Kensley and Williams, 1986; USNM 211366  
*Hippolyte palliola* Kensley, 1970c; SAM A12710  
*Lebbeus yaldwyni* Kensley, Tranter, and Griffin, 1988; AM P26561  
*Macrobrachium ferreirai* Kensley and Walker, 1982; INPA  
*Macrobrachium inpa* Kensley and Walker, 1982 INPA  
*Merhippolyte chacei* Kensley, Tranter, and Griffin, 1988; AM P19092

*Michelea* Kensley and Heard, 1991b  
*Michelea lamellosa* Kensley and Heard, 1991b; USNM 243468  
*Michelea pillsburyi* Kensley and Heard, 1991b; USNM 243469  
*Pasiphaea berentsae* Kensley, Tranter, and Griffin, 1988; AM P26768  
*Pasiphaea kapala* Kensley, Tranter, and Griffin, 1988; AM P33133  
*Pasiphaea longitaenia* Kensley, Tranter, and Griffin, 1988; AM P35196  
*Pasiphaea meiringnaudei* Kensley, 1977d; SAM A15316  
*Plesionika grahami* Kensley, Tranter, and Griffin, 1988; AM P35897  
*Posthonorcaris* Kensley, 1989b  
*Pseudocheles chacei* Kensley, 1983b; USNM 189094  
*Pseudopalaemon chryseus* Kensley and Walker, 1982; INPA  
*Pseudopalaemon gouldingi* Kensley and Walker, 1982; INPA  
*Pseudopalaemon nigrannnis* Kensley and Walker, 1982; INPA  
*Sakaioecaris* Kensley, 1989b  
*Tridiscias* Kensley, 1983b  
*Tridiscias transkei* Kensley, 1983b; SAM A18812  
*Vetericaris* Kensley and Williams, 1986  
*Vetericaris chaceorum* Kensley and Williams, 1986; USNM 2113364  
*Yagerocaris* Kensley, 1988b  
*Yagerocaris cozumel* Kensley, 1988b; USNM 211445

### Copepoda

*Brachiella lithognathae* Kensley, 1973d; SAM A13030  
*Caligus mortis* Kensley, 1970b; SAM A12708  
*Caligus penrithi* Kensley, 1973d; SAM A13050  
*Clausidium saldanhae* Kensley, 1973c; SAM A13177  
*Gunentophorus blaizei* Kensley, 1973d; SAM A13049  
*Lepeophtheirus lalandei* Kensley, 1973d; SAM A13052  
*Lepeophtheirus natalensis* Kensley, 1973d; SAM A13054  
*Lernaeenicus gonostomae* Kensley, 1973d; SAM A 11751  
*Lernanthropodes natalensis* Kensley, 1973d; SAM A13034  
*Lernanthropus ecclesi* Kensley, 1973d; SAM A13021  
*Lernanthropus sarbae* Kensley, 1973d; SAM A13020  
*Lophoura elongata* Kensley, 1973d; SAM A11802  
*Naobranchia pritchardae* Kensley, 1973d; SAM A13042  
*Pseudocycnoides rugosa* Kensley, 1973d; SAM A13058

### Isopoda

*Accalathura hastata* Kensley and Schotte, 2000; USNM 253138  
*Accalathura phuketensis* Kensley and Schotte, 2000; ZMUC  
*Accalathura setosa* Kensley, 1984c; USNM 211210  
*Accalathura wardae* Kensley and Schotte, 2000; USNM 253144  
*Aega falcata* Kensley and Chan, 2001; NTOU H-1999-4-8  
*Agulanthura* Kensley, 1975b  
*Agulanthura serenasinus* Kensley, 1974b; SAM A13553  
*Agularcturus* Kensley, 1984b  
*Agularcturus granulatus* Kensley, 1984b; SAM A15666  
*Alloanthura* Kensley, 1980e  
*Alloanthura sculpta* Kensley, 1980e; USNM 171689  
*Amakusanthura cosmoledo* Kensley and Schotte, 2000; USNM 253185  
*Arcinus belizensis* Kensley and Schotte, 1987; USNM 211401  
*Angliera psamathus* Kensley, 1984c; USNM 211322  
*Anopsilana jonesi* Kensley, 1987b; USNM 221722  
*Anopsilana sinu* Kensley and Schotte, 1994b; USNM 252771  
*Antarcturus bicornis* Kensley, 1984b; SAM A15670  
*Anthomuda quadrilineata* Kensley and Schotte, 2000; USNM 253159  
*Antidorcasia* Kensley, 1971c  
*Antidorcasia elongata* Kensley, 1971c; SAM A12834  
*Apanthura cracenta* Kensley, 1984c; USNM 211217  
*Apanthura geminsula* Kensley, 1982b; USNM 171186  
*Apanthura insignifica* Kensley, 1978i; SAM A15646  
*Apanthura mana* Kensley, 1979d; USNM 17221  
*Apanthura microps* Kensley, 1980e; USNM 171690  
*Apanthura zeewyckae* Kensley and Poore, 1981; AM P32392  
*Apanthuroides aldabrae* Kensley and Schotte, 2000; USNM 253108  
*Apanthuroides calculosa* Kensley and Schotte, 2000; USNM 253099  
*Arabanthura enigmatica* Kensley and Reid, 1984; USNM 211343  
*Arcturina scutula* Kensley, 1975b; SAM A13537  
*Arcturinoides* Kensley, 1977a  
*Arcturinoides sexpes* Kensley, 1977a; SAM A15350  
*Argeiopsis* Kensley, 1974a  
*Argeiopsis inhacae* Kensley, 1974a; SAM A10979

*Astacilla eminentia* Kensley, 1984b; SAM A15673  
*Astacilla marna* Kensley and Schotte, 1994b; USNM 252793  
*Astacilla regina* Kensley, 1984c; USNM 211334  
*Austroarcturus* Kensley, 1975b  
*Austroarcturus foveolatus* Kensley, 1975b; SAM A13540  
*Austroarcturus africanus* Kensley, 1975b; SAM A 13542  
*Bagatus punctatus* Kensley, 1984c; USNM 211300  
*Bathylana* Kensley, 1989a  
*Bathylana apalpalis* Kensley, 1989a; MNHN Is. 2775  
*Bathynathia porca* Kensley, 1980c; Paris Museum Is. 1019  
*Bathynataliidae* Kensley, 1978h  
*Belizanthura* Kensley, 1982b  
*Belizanthura imswe* Kensley, 1982b; USNM 171172  
*Bullowanthura aquitania* Kensley, 1982c; USNM 185018  
*Caenanthura* Kensley, 1978e  
*Caenanthura siamensis* Kensley, 1978e; ZMUC  
*Califanthura dodecaseta* Kensley, 2003b; AMNH 18385  
*Califanthura minuta* Kensley and Heard, 1991a; USNM 243271  
*Carpis mossambica* Kensley and Schotte, 2002; USNM 253359  
*Cassidinidea mosaica* Kensley and Schotte, 1987; USNM 211403  
*Cetanthura* Kensley, 1982c  
*Cetanthura foveoderma* Kensley, 1982c; USNM 185016  
*Chalixanthura* Kensley, 1984c  
*Chalixanthura lewisi* Kensley and Snelgrove, 1987; NMNS-NMC-C-1986-1122  
*Chalixanthura scopulosa* Kensley, 1984c; USNM 211201  
*Cirolana albidoidea* Kensley and Schotte, 1987; USNM 211419  
*Cirolana bougaardti* Kensley, 1984b; SAM A17834  
*Cirolana caeca* Kensley, 1978f; SAM A15468 = *Cirolana anocula* Kensley, 1984b  
*Cirolana convexissima* Kensley, 1984b; SAM A17836  
*Cirolana crenulitelson* Kensley and Schotte, 1987; USNM 221619  
*Cirolana obtusispina* Kensley, 1975b; SAM A13558  
*Cleantioides* Kensley, 1978k  
*Cleantioides verecundus* Kensley and Clark, 1998; USNM 253361  
*Coatonia* Kensley, 1971c  
*Coatonia phylloniscoides* Kensley, 1971c; SAM A12829  
*Colanthura pigmentata* Kensley, 1980e; USNM 171684  
*Colanthura pingouin* Kensley, 1980c; Paris Museum Is. 1016  
*Colanthura uncinata* Kensley, 1978i; SAM A15652  
*Coralanthura* Poore and Kensley, 1981  
*Coralanthura ardea* Poore and Kensley, 1981; NMV J827  
*Coralanthura endeavorae* Poore and Kensley, 1981; NMV J821  
*Coulmannia unicornis* Kensley, 1976b; Paris Museum Is. 1010  
*Curassanthura halma* Kensley, 1981a; ZMA Is. 105  
*Curassanthura jamaicensis* Kensley, 1992; USNM 243573  
*Cyathura esquivel* Kensley, Ortiz, and Schotte, 1997; IO-12.055  
*Cyathura profunda* Kensley, 1982c; USNM 185036  
*Cyathura rudloei* Kensley, 1980e; ZMUC  
*Cymodoce alia* Kensley, 1975b; SAM A13560  
*Cymodoce ruetzleri* Kensley, 1984c; USNM 211230  
*Cymodoce velutina* Kensley, 1975b; SAM A 13629  
*Cymodocella sapmeri* Kensley, 1976b; Paris Museum Is. 1004  
*Diaphoranthura* Kensley, 1980e  
*Diaphoranthura cracens* Kensley, 1980e; USNM 171698  
*Diaphoranthura hapla* Kensley, 1980e; USNM 171702  
*Dynamenella nuevitas* Kensley, Ortiz, and Schotte, 1997; IO-12.048  
*Dynamenella quadrilirata* Kensley, 1984c; USNM 211239  
*Dynamenopsis angolensis* Kensley, 1971b; SAM A12839  
*Echinomunna uroventralis* Kensley, 1976b; Paris Museum Is. 1012  
*Eisothistos andamanensis* Kensley and Schotte, 2000; USNM 253129  
*Eisothistos corallina* Kensley and Schotte, 2000; USNM 253127  
*Eisothistos crateris* Kensley, 1976b; Paris Museum Is. 1001  
*Eisothistos bataviae* Kensley and Poore, 1981; AM-P32395  
*Eisothistos petrensis* Kensley, 1984c; USNM 211202  
*Eisothistos teri* Kensley and Snelgrove, 1987; NMNS-NMC-C-1986-1134  
*Epipenaeon fissurae* Kensley, 1974a; SAM A13175  
*Eurycope glabra* Kensley, 1978f; SAM A15452  
*Eurydice personata* Kensley, 1987b; USNM 211436  
*Excirrolana bicornis* Kensley, 1978f; SAM A15469  
*Exallanthura* Kensley, 1980e  
*Exallanthura sexpes* Kensley, 1980e; USNM 171706  
*Exosphaeroides quadricosta* Kensley, 2003b; AMNH 18423  
*Gnathia rathi* Kensley, 1984c; USNM 211328



- Haliophasma austroafricanum* Kensley, 1982a; SAM A14078  
*Haliophasma caecus* Kensley, 1975d; SAM A13626  
*Haliophasma poorei* Kensley, 1980e; USNM 171708  
*Hansenium aldabrae* Kensley and Schotte, 2002; USNM 253194  
*Hansenium expansum* Kensley and Schotte, 2002; USNM 253205  
*Hansenium remocarpus* Kensley and Schotte, 2002; USNM 253198  
*Hansenium thomasi* Bolstad and Kensley, 1999; USNM 253350  
*Hansenium tropex* Bolstad and Kensley, 1999; USNM 253348  
*Haplomesus zuluensis* Kensley, 1984b; SAM A17858  
*Haploniscus gernekei* Kensley, 1978f; SAM A15454  
*Harrieta* Kensley, 1987c  
*Heptanthura* Kensley, 1978e  
*Heptanthura novaezealandiae* Kensley, 1978; USNM 171227  
*Heptanthura phuket* Kensley and Schotte, 2000; ZMUC  
*Heteranthura* Kensley, 1980e  
*Heteranthura anomala* Kensley, 1980e; USNM 171710  
*Holoranthura capensis* Kensley, 1975b; SAM A13555  
*Ianiroides* Kensley, 1976b  
*Ianisera* Kensley, 1976b  
*Ianisera expansa* Kensley, 1984b; SAM A17841  
*Ianisera trespidus* Kensley, 1976b; Paris Museum Is. 1007  
*Iais floridana* Kensley and Schotte, 1999; USNM 243843  
*Ischnomesus glabra* Kensley, 1984b; SAM A17860  
*Ilyarachna crozetensis* Kensley, 1980c; Paris Museum Is. 1017  
*Ilyarachna wolffi* Kensley, 1978f; SAM A15457  
*Joeropsis algensis* Kensley and Schotte, 2002; USNM 253362  
*Joeropsis arpedes* Kensley and Schotte, 2002; USNM 253214  
*Joeropsis (sic) beuroisi* Kensley, 1975c; SAM A14250  
*Joeropsis bicornis* Kensley, 2003b; AMNH 18393  
*Joeropsis bifasciatus* Kensley, 1984c; USNM 211311  
*Joeropsis coralicola* Kensley, 1984c; USNM 133595  
*Joeropsis dimorpha* Kensley and Schotte, 2002; USNM 253215  
*Joeropsis hamatilis* Kensley and Schotte, 2002; USNM 253236  
*Joeropsis integer* Kensley, 1984b; SAM A17852  
*Joeropsis juvenalis* Kensley, Ortiz, and Schotte, 1997; IO-12.053  
*Joeropsis lentigo* Kensley and Schotte, 2002; USNM 253222  
*Joeropsis limbatus* Kensley, 2003b; AMNH 18395  
*Joeropsis (sic) monsmarinus* Kensley, 1980d; SAM A16780  
*Joeropsis nigricapitis* Kensley, 1994a; YPM 9551  
*Joeropsis pentagona* Kensley and Schotte, 2002; USNM 253231  
*Joeropsis personatus* Kensley, 1984c; USNM 211313  
*Joeropsis pleurion* Kensley and Schotte, 2002; USNM 253233  
*Joeropsis sanctipauli* Kensley, 1989a; MNHN Is. 2771  
*Joeropsis serrulus* Kensley, 1984b; SAM A17854  
*Joeropsis (sic) stebbingi* Kensley, 1975c; SAM A127338  
*Joeropsis tobagoensis* Kensley and Schotte, 1994b; USNM 252761  
*Joeropsis trilabes* Kensley, 2003b; AMNH 18397  
*Joeropsis unidentata* Kensley, Ortiz, and Schotte, 1997; IO-12.050  
*Joeropsis (sic) waltervadi* Kensley, 1975c; SAM A13646  
*Katanthura laevitelson* Kensley, 1975b; SAM A13552  
*Leptanthura agulhasensis* Kensley, 1975b; SAM A13550  
*Leptanthura argentinae* Kensley, 1982c; USNM 185021  
*Leptanthura calcis* Kensley and Schotte, 2000; USNM 253148  
*Leptanthura guianae* Kensley, 1982c; USNM 185024  
*Leptanthura maheensis* Kensley and Schotte, 2000; USNM 2253154  
*Leptanthura micrura* Kensley, 1982c; USNM 185027  
*Leptanthura minuta* Kensley, 1978i; SAM A15654  
*Leptanthura natalensis* Kensley, 1978i; SAM A15657  
*Leptanthura urospinosa* Kensley, 1975b; SAM A13619  
*Licranthura* Kensley and Schotte, 1987  
*Licranthura amyle* Kensley and Schotte, 1987; USNM 211408  
*Licranthura tuberculata* Kensley and Heard, 1991a; USNM 243474  
*Malacanthura antarctica* Kensley, 1982c; USNM 185000  
*Malacanthura arabica* Kensley and Schotte, 2000; USNM 253268  
*Malacanthura cantabrica* Kensley, 1982c; USNM 185003  
*Malacanthura mombassa* Kensley, 1980e; USNM 171712  
*Malacanthura schotteae* Kensley, 1982a; SAM A17525  
*Malacanthura transkei* Kensley, 1982a; SAM A17531  
*Maresiella aldabrana* Kensley and Schotte, 2002; USNM 253297  
*Mesanthura bermudensis* Kensley, 1994a; YPM 9553  
*Mesanthura bivittata* Kensley, 1987b; USNM 221718  
*Mesanthura childi* Kensley, 1979d; SAM 172273  
*Mesanthura dimorpha* Kensley, 1982a; SAM A17534  
*Mesanthura fasciata* Kensley, 1982c; USNM 171162  
*Mesanthura frances* Kensley, Ortiz, and Schotte, 1997; IO-12.058  
*Mesanthura looensis* Kensley and Schotte, 1987; USNM 211406  
*Mesanthura pascuensis* Kensley, 2003b; AMNH 18382  
*Mesanthura protei* Kensley, 1980e; USNM 171713  
*Mesanthura punctillata* Kensley, 1982c; USNM 171157  
*Mesanthura quadrata* Kensley and Schotte, 2000; USNM 253163  
*Mesanthura reticulata* Kensley, 1982c; USNM 171161  
*Mesanthura spongicola* Kensley and Heard, 1991a; USNM 243479  
*Metacirolana agaricicola* Kensley, 1984c; USNM 211259  
*Metacirolana arnaudi* Kensley, 1989a; MNHN Is. 2774  
*Metacirolana halia* Kensley, 1984c; USNM 211263  
*Metacirolana menziesi* Kensley, 1984c; USNM 211251  
*Microarcturus barnardi* Kensley, 1984b; SAM A17797  
*Microarcturus biserialis* Kensley, 1978f; SAM A15467  
*Microarcturus dayi* Kensley, 1977a; SAM A15353  
*Microarcturus halei* Kensley, 1984b; SAM A17803  
*Microarcturus laevis* Kensley, 1975b; SAM A12544  
*Microarcturus longispinus* Kensley, 1984b; SAM A17810  
*Microarcturus nordenstami* Kensley, 1984b; SAM A17812  
*Microarcturus ornatus* Kensley, 1975b; SAM A13546  
*Microarcturus quadriconus* Kensley, 1975b; SAM A13548  
*Microarcturus youngi* Kensley, 1978f; SAM A15465  
*Microcerberus syrticus* Kensley, 1984c; USNM 211326  
*Microcharon sabulum* Kensley, 1984c; USNM 211324  
*Minyanthura* Kensley, 1982c  
*Minyanthura coralicola* Kensley, 1982c; USNM 171169  
*Miratidotea* Kensley, 1987b  
*Miratidotea bruscai* Kensley, 1987b; USNM 221720  
*Mizothener serratum* Kensley and Schotte, 2002; USNM 253201  
*Munna caprinsula* Kensley and Schotte, 1994b; USNM 252767  
*Munna petronastes* Kensley, 1984c; USNM 211319  
*Munna powelli* Kensley, 1980a; USNM 172997  
*Munna (Munna) sheltoni* Kensley, 1977a; SAM A15347  
*Munnogonium somersensis* Kensley, 1994a; USNM 243587  
*Munnogonium subtilis* Kensley, 1976b; Paris Museum Is. 1009  
*Munnopsis bispinosus* Kensley, 1977a; SAM15346  
*Namibianira* Kensley, 1995  
*Namibianira aigamasensis* Kensley, 1995; SMN 51603  
*Namibianira aikabensis* Kensley, 1995; SMN 51615  
*Namibianira arnhemensis* Kensley, 1995; SMN 51604  
*Namibianira dracohalitus* Kensley, 1995; SMN 51605  
*Natalanthura* Kensley, 1978i  
*Natalanthura fijiensis* Kensley, 1979d; USNM 172275  
*Natalanthura foveolata* Kensley, 1978i; SAM A15648  
*Natalianira* Kensley, 1984b  
*Natalianira spinosa* Kensley, 1984b; SAM A17865  
*Naudea* Kensley, 1979a  
*Naudea louwae* Kensley, 1979a; SAM A16205  
*Neastacilla longispina* Kensley, 1978f; SAM A15459  
*Neastacilla tranquilla* Kensley, 1975b; SAM A13615  
*Neohyssura gladia* Kensley and Schotte, 2000; USNM 253134  
*Neohyssura skolops* Kensley, 1978i; SAM A15651  
*Niambia (Niambia) termitophila* Kensley, 1971; SAM A12826  
*Nikione* Kensley, 1974a  
*Nikione natalensis* Kensley, 1974a; SAM A13174  
*Notoxenoides acalama* Kensley, 1984b; SAM A17857  
*Ocsanthura* Kensley, 1978d  
*Ocsanthura gracilis* Kensley, 1982c; USNM 185010  
*Ocsanthura vimsae* Kensley, 1978d; USNM 170859  
*Panathura amstelodami* Kensley, 1976b; Paris Museum Is, 1002  
*Panathura collaris* Kensley, 1979d; USNM 172267  
*Panathura haddae* Kensley and Poore, 1981; AM P32399  
*Panathura indica* Kensley and Schotte, 2000; USNM 253131  
*Panathura macronesia* Kensley, 1980e; USNM 171719  
*Paracanthaspidia natalensis* Kensley, 1977a; SAM 15349  
*Paracerceis cohenae* Kensley, 1984c; USNM 211244  
*Paracerceis glynni* Kensley, 1984c; USNM 211248  
*Paranthura algophila* Kensley and Schotte, 2000; USNM 253170  
*Paranthura astrolabium* Kensley, 1979d; SAM 172283  
*Paranthura seychellensis* Kensley and Schotte, 2000; USNM 253174  
*Paranthura urodentata* Kensley and Schotte, 2000; USNM 253180  
*Paracilicaca cordylina* Kensley, 1984b; SAM A17838  
*Paraimene charlesae* Kensley and Schotte, 1994b; USNM 252774  
*Paraimene ibarabalae* Kensley, Ortiz, and Schotte, 1997; IO-12.045



*Paraimene tumulus* Kensley, Ortiz, and Schotte, 1997; IO-12.060  
*Paramunna pellucida* Kensley, 2003b; AMNH 18407  
*Paranthura caribbiensis* Kensley, 1982c; USNM 171164  
*Paranthura nordenstami* Kensley, 2003b; AMNH 18388  
*Paranthura polynesica* Kensley, 1979d; SAM 172285  
*Paranthura possessia* Kensley, 1980c; Paris Museum Is. 1014  
*Pendanthura hendleri* Kensley, 1984c; USNM 211224  
*Pendanthura picardi* Kensley and Schotte, 2000; USNM 2531125  
*Pendanthura rarotonga* Kensley, 1979d; USNM 172281  
*Pendanthura seminigra* Kensley and Schotte, 2000; USNM 253118  
*Pendanthura siamensis* Kensley and Schotte, 2000; USNM 253121  
*Phycolimmoria clarkae* Kensley and Schotte, 1987; USNM 211426  
*Phylloniscus contractus* Kensley, 1971c; SAM A12832  
*Pleurocope wilsoni* Kensley and Schotte, 2002; USNM 253308  
*Pleurosignum capensis* Kensley, 1977a; SAM A15355  
*Prethura hutchingsae* Kensley, 1982d; NMV  
*Pseudanthura albatrossae* Kensley, 1978c; USNM 170273  
*Pseudoanthura recifensis* Kensley, 1982c; USNM 185035  
*Pseudanthura tenuis* Kensley, 1978c; SAM A15644  
*Pseudione elongate africana* Kensley, 1968a; SAM A12565  
*Pseudocerceis latistylis* Kensley and Schotte, 1994b; USNM 252780  
*Pseudojanira meganesus* Kensley and Schotte, 2002; USNM 253317  
*Ptilanthura colpos* Kensley, 1996; USNM 253242  
*Quantanthura andamanensis* Kensley and Schotte, 2000; ZMUC  
*Quantanthura menziesi* Kensley, 1979e; National Museum in Rio de Janeiro, Brazil  
*Quantanthura sinuata* Kensley, 1982c; USNM 185015  
*Rhiganthura* Kensley, 1978e  
*Rhiganthura spinosa* Kensley, 1978e; USNM 171229  
*Salviatella islapascua* Kensley, 2003b; AMNH 18399  
*Santia longisetae* Kensley, 2003b; AMNH 18409  
*Santia spicata* Kensley and Schotte, 2002; USNM 253300  
*Santia urospinosa* Kensley and Schotte, 2002; USNM 253304  
*Sauranthura* Poore and Kensley, 1981  
*Sauranthura goldmanorum* Poore and Kensley, 1981; NMV J831  
*Sauranthura rapanui* Kensley, 2003b; AMNH 18383  
*Serolis brinki* Kensley, 1978f; SAM A15460  
*Seychellana* Kensley and Schotte, 1994  
*Seychellana expansa* Kensley and Schotte, 1994; USNM 252889  
*Skuphonura ecuadorensis* Kensley, 1980b; USNM 173525  
*Skuphonura itapuca* Kensley, 1980b; USNM 173522  
*Sphaeromopsis heardi* Kensley and Schotte, 1994b; USNM 252785  
*Sphaeromopsis sanctaluciae* Kensley and Schotte, 1999; USNM 285356  
*Spinianirella serrata* Kensley and Heard, 1985; USNM 211360  
*Spiniarcturus* Kensley, 1978f; SAM A15473  
*Stenetrium assummentum* Kensley and Schotte, 2002; ZMUC  
*Stenetrium bowmani* Kensley, 1984c; USNM 211293  
*Stenetrium caicosensis* Kensley and Heard, 1991a; USNM 243476  
*Stenetrium patulipalma* Kensley, 1984c; USNM 211284  
*Stenetrium quinquedens* Kensley and Schotte, 2002; USNM 253208  
*Stenetrium perestrelloi* Kensley, 1984b; SAM A17839  
*Stenetrium spathulicarpus* Kensley, 1984c; USNM 211274  
*Stenetrium vema* Kensley, 1980d; SAM A16780  
*Stenetrium zanzibarica* Kensley and Schotte, 2002; ZMUC  
*Stenobermuda brucei* Kensley and Schotte, 2002; ZMUC  
*Stenobermuda iliffei* Kensley, 1994a; USNM 243589  
*Stylomesus natalensis* Kensley, 1984b; SAM A17861  
*Uromunna biloba* Kensley, 2003b; AMNH 18401  
*Valoranthura* Kensley, 1978e  
*Valoranthura abyssorum* Kensley, 1978e; BM 1911.11.8.7545  
*Venezanthura* Kensley, 1978e  
*Venezanthura confixa* Kensley, 1978e; USNM 171226  
*Virganthura* Kensley, 1987a  
*Xenanthura victoriae* Kensley and Schotte, 2000; USNM 253183  
*Xylolana* Kensley, 1987b  
*Xylolana radiciola* Kensley, 1987b; USNM 211437

### Leptostraca

*Nebalia ilhoensis* Kensley, 1976a; SAM A14997

### Penaeidea

*Austropenaeus* Pérez Farfante and Kensley, 1997  
*Benthesicymus expansus* Kensley, 1977d; SAM A15140

*Cryptopenaeus crosnieri* Pérez Farfante and Kensley, 1985; AM P32481  
*Haliporoides cristatus* Kensley, Tranter, and Griffin, 1987; Am P35893  
*Haliporoides sibogae australiensis* Kensley, Tranter, and Griffin, 1988; AM P34381  
*Hymenopenaeus kannemeyeri* Kensley, 1977d; SAM A15141  
*Megokris* Pérez Farfante and Kensley, 1997  
*Rimapenaeus* Pérez Farfante and Kensley, 1997

### Palinurida

*Willemoesia bonaspei* Kensley, 1968b; SAM A10543

### Stenopodidea

*Odontozona spinosissima* Kensley, 1981c; SAM A16811

### Thalassinidea

*Acanthaxius formosa* Kensley and Chan, 1998; USNM 255357  
*Acanthaxius foveolatus* Kensley, Lin, and Yu, 2000; NTOU H-1998-8-10  
*Acanthaxius grandis* Kensley and Chan, 1998; USNM 253356  
*Acanthaxius kirkmilleri* Kensley, 1996; USNM 243492  
*Ambiaxius japonicus* Kensley, 1996e; USNM 243401  
*Axianassa arenaria* Kensley and Heard, 1990; USNM 221490  
*Axianassa canalis* Kensley and Heard, 1990; USNM 125897  
*Axianassa jamaicensis* Kensley and Heard, 1990; USNM 155732  
*Axiopsis eximia* Kensley and Williams, 1990; USNM 219431  
*Axiopsis pica* Kensley, 2003a; USNM 296400  
*Axiorygma* Kensley and Simmons, 1988  
*Axiorygma nethertoni* Kensley and Simmons, 1988; USNM 211440  
*Bouvieraxius springeri* Kensley, 1996e; USNM 243510  
*Calastacus colpos* Kensley, 1996b; USNM 243393  
*Calastacus crosnieri* Kensley and Chan, 1998; USNM 253355  
*Calastacus mexicanus* Kensley, 1996b; USNM 211496  
*Calaxius carneyi* Felder and Kensley, 2004; USNM 1009165  
*Calaxius galapagensis* Kensley and Hickman, 2001; USNM 308977  
*Calaxius manningi* Kensley, Lin and Yu, 2000; NTOU H-1999-1-11  
*Callianassa adamas* Kensley, 1974d; SAM A12103  
*Callistocaris* Kensley, 1989b  
*Calocarides capensis* Kensley, 1996d; SAM A940  
*Calocarides chani* Kensley, Lin, and Yu, 2000; NTOU H-1995-11-2  
*Calocarides macphersoni* Kensley, 1996d; USNM 243561  
*Calocarides caribbaeus* Kensley, 1996b; USNM 243417  
*Corallichirus bayeri* Kensley, 2001c; USNM 310677  
*Coralaxius* Kensley and Gore, 1981  
*Coralaxius abelei* Kensley and Gore, 1981; USNM 173629  
*Coralaxius galapagensis* Kensley, 1994c; USNM 243578  
*Coralaxius indopacificus* Kensley, 1994c; USNM 243414  
*Eiconaxius albatrossae* Kensley, 1996e; MCZ 4568  
*Eiconaxius baja* Kensley, 1996e; USNM 211494  
*Eiconaxius kimbla* Kensley, 1996e; AM P25015  
*Entoplometopus chacei* Kensley and Child, 1986; Philippines National Museum  
*Eutrichocheles pindatyba* Rodrigues and Kensley, 1991; MZUSP 10580  
*Lophaxius* Kensley, 1989b  
*Lophaxius rathbunae* Kensley, 1989b; USNM 28316  
*Manaxius* Kensley, 2003a  
*Marcusaxius collos* Kensley and Heard, 1991b; USNM 243404  
*Marianaxius* Kensley, 1996e  
*Marianaxius kroppi* Kensley, 1996e; USNM 243530  
*Meticonaxius bouvieri* Kensley and Heard, 1991b; USNM 243408  
*Mictaxius* Kensley and Heard, 1991b  
*Mictaxius thalassicola* Kensley and Heard, 1991b; USNM 243544  
*Oxyrhynchaxius manningi* Kensley and Chan, 2000; NMV J15419  
*Paraxiopsis foveolata* Kensley, 1996a; USNM 243390  
*Paraxiopsis gracilimana* Kensley, 1996a; USNM 169669  
*Paraxiopsis granulimana* Kensley, 1996a; USNM 243387  
*Paraxiopsis hispida* Kensley, 1996a; USNM 243389  
*Paraxiopsis majuro* Kensley, 2003a; USNM 243603  
*Paraxiopsis paulayi* Kensley, 2003a; USNM 296395  
*Paraxiopsis plumosimanus* Kensley, 2003a; USNM 296394  
*Paraxiopsis spinipleura* Kensley, 1996a; USNM 243581

### MOLLUSCA

*Aloidis palaegialus* Carrington and Kensley, 1969b; SAM K1451  
*Arca (Acar) halmyrus* Carrington and Kensley, 1969b; SAM K1448

*Argobuccinum casus* Kensley and Pether, 1986; SAM PQ AV523  
*Bolma anoropha* Kensley and Pether, 1986; SAM PQ KN516  
*Burnupena aestus* Kensley and Pether, 1986; SAM PQ AV541  
*Burnupena rogersi* Kensley and Pether, 1986; SAM PQ HB539  
*Calliostoma depressa* Carrington and Kensley, 1969b; SAM K1440  
*Calyptraea aurita striata* Carrington and Kebsley, 1969b; SAM K1433  
*Calyptraea kilburni* Kensley and Pether, 1986; SAM PQ HB148  
*Calyptraea viridarena* Carrington and Kensley, 1969b; SAM K1432  
*Cardita unica* Kensley and Pether, 1986; SAM PQ KN566  
*Carditella calipsamma* Carrington and Kensley, 1969b; SAM K 1449  
*Clanculus lutosus* Kensley and Pether, 1986; SAM PQ KN12  
*Clanculus murrayi* Carrington and Kensley, 1969b; SAM K 1434  
*Crepidula deprima* Kensley and Pether, 1986; SAM PQ HB519  
*Cuna aquaedulcensis* Kensley, 1977e; SAM L25892W  
*Donax haughtoni* Carrington and Kensley, 1969b; SAM K1430  
*Dosinia (Dosinia) sicarisinus* Kensley and Pether, 1986; SAM K4877  
*Drillia tempestae* Kensley and Pether, 1986; SAM PQ HB554  
*Epitonium (Gyroscale) lycocephalum* Kensley and Pether, 1986; SAM PQ HB527  
*Fassiolaria dinglei* Kensley and Pether, 1986; SAM PQ AV547  
*Fissurella glarea* Carrington and Kensley, 1969b; SAM K1438  
*Gastrana rostrata* Carrington and Kensley, 1969b; SAM K1426  
*Gibbula zonata patula* Kensley and Pether, 1986; SAM PQ HB514  
*Glycymeris fulleri* Kensley and Pether, 1986; SAM PQ SL561  
*Hespererato oppenheimeri* Carrington and Kensley, 1969b; SAM K1428  
*Isognomon gariesensis* Kensley and Pether, 1986; SAM PQ HB564  
*Melapium hawthornei* Kensley and Pether, 1986; SAM PQ KN549  
*Namamurex* Carrington and Kensley, 1969b

*Namamurex odontostoma* Carrington and Kensley, 1969b; SAM K1437  
*Nassa litorafontis* Carrington and Kensley, 1969b; SAM K1441  
*Ocenebra petrocyon* Kensley and Pether, 1986; SAM PQ HB533  
*Patella hendleyi* Kensley and Pether, 1986; SAM PQ AV454  
*Patella hoffmanni* Kensley and Pether, 1986; SAM PQ AV508  
*Pseudoliva lutulenta* Kensley and Pether, 1986; SAM PQ KN552  
*Standella (Eastonia) namaquensis* Carrington and Kensley, 1969b; SAM K1424  
*Terebra canisaxi* Kensley and Pether, 1986; SAM PQ HB557  
*Thais arenae* Kensley and Pether, 1986; SAM PQ KN530  
*Tritonalia bonaccorsii* Carrington and Kensley, 1969b; SAM K1436  
*Trophon carringtoni* Kensley and Pether, 1986; SAM PQ AV536  
*Turris nigrovitta* Carrington and Kensley, 1969b; SAM K1443

#### ACKNOWLEDGEMENTS

I appreciate the willingness of Gary Poore, Niel Bruce, John Pickett, and Ross Donald to provide thoughtful comments quoted herein. I also thank Dr. Rafael Lemaitre for reviewing, with good advice, an earlier draft of this paper, and Molly Kelly Ryan for assistance with the figure.

Respectfully submitted:  
 Marilyn Schotte  
 Department of Invertebrate Zoology  
 Smithsonian Institution  
 Washington, D.C. 20013-7012, U.S.A.
